# Supplementary material for: Electronic configuration regulation of single-atomic Mn sites mediated by Mo/Mn clusters for an efficient hydrogen evolution reaction
Source: Royal Society of Chemistry journal article supplement (doi:10.1039/d3sc06053e), 2024-01-01
Supplement: d3sc06053e1.pdf [file d3sc06053e1.pdf]

1

## Supplementary Material

2

### 3 **Single-Atomic Mn Sites of Electronic Configuration** 4 **Regulation mediated by Mo/Mn Clusters for Efficient** 5 **Hydrogen Evolution Reaction**

6

7

8 Chengyu Zhang <sup>a,b,c</sup>, Xiangyang Wang <sup>a,b,c</sup>, Renyuan Zhao <sup>a,b,c</sup>, Fabrice Ndayisenga <sup>a,b,c</sup>, Zhisheng  
9 Yu <sup>a,b,c</sup> \*

10

11 <sup>a</sup> College of Resources and Environment, University of Chinese Academy of Sciences, 19 A Yuquan  
12 Road, Beijing 100049, P.R. China;

13 <sup>b</sup> Binzhou Institute of Technology, Weiqiao-UCAS Science and Technology Park, Binzhou City  
14 256606, Shandong Province, P.R. China;

15 <sup>c</sup> RCEES-IMCAS-UCAS Joint-Lab of Microbial Technology for Environmental Science, Beijing  
16 100085, China.

17

18 \* Corresponding author.

19 Correspondence should be addressed to Prof. Zhisheng Yu (yuzs@ucas.ac.cn), Tel.: +86-10-  
20 88256057; Fax: +86-10-88256057.

21

## 22 **Text S1 Experimental Procedures**

### 23 **Electrochemical measurement**

24 The electrochemical research uses a standard three-electrode electrolytic cell with  
25 0.5 M H<sub>2</sub>SO<sub>4</sub>, in which the saturated calomel electrode (SCE) is used as the reference  
26 electrode, the graphite rod is used as the counter electrode, and the glass carbon  
27 electrode with a diameter of 5 mm is used as the working electrode. All potentials were  
28 referenced with a reversible hydrogen electrode (RHE).

29 5 mg of each catalyst was added 1000 uL anhydrous ethanol and 20 uL Nafion 117  
30 solution respectively, and ultrasonic dispersion was carried out for 50 min to form a  
31 uniform catalyst ink. 40 uL of the ink was added to the surface of a glassy carbon  
32 electrode (5 mm in diameter, superficial area: 0.19625 cm<sup>2</sup>) and dried under ambient  
33 conditions for 4 h. The mass loading on the glassy carbon electrode was 1 mg cm<sup>-2</sup>. A  
34 commercial Pt (20 wt %) on carbon was used as the reference sample.

35 The HER polarization curve of the catalyst-loaded glassy carbon electrode was  
36 obtained by Linear sweep voltammetry (LSV), the potential window was 0 ~ -0.6 V vs.  
37 RHE, and at a scan rate of 1 mV s<sup>-1</sup>. Electrochemical impedance measurements (EIS)  
38 were carried out from 100 kHz to 100 mHz and obtained at a current density of 10 mA  
39 cm<sup>-2</sup>. All subsequent measurements were corrected to an uncompensated resistance of  
40 85% of the R<sub>u</sub> value. The overpotential of the catalyst was obtained at current densities  
41 of 10 mA cm<sup>-2</sup>. To estimate the electroactive surface area (ECSA) of the catalyst, we  
42 measured cyclic voltammograms between -0.07 ~ -0.17 V vs. RHE at scan rates of 10,  
43 20, 40, 80, 120, 160, and 200 mV s<sup>-1</sup>, respectively. The calculation of the Turnover  
44 frequency (TOF) value of the catalyst was based on the equation  $TOF = I/2nF$ . Where  
45 I, n, and F represent the current (A) obtained during the LSV test in 0.5 M H<sub>2</sub>SO<sub>4</sub>  
46 solution, and the active site number of points (mol) and Faraday constant (96485 C mol<sup>-1</sup>  
47 <sup>1</sup>). The number 2 represents the number of moles of electrons consumed to liberate 1  
48 mol H<sub>2</sub> from water.

49

50

51

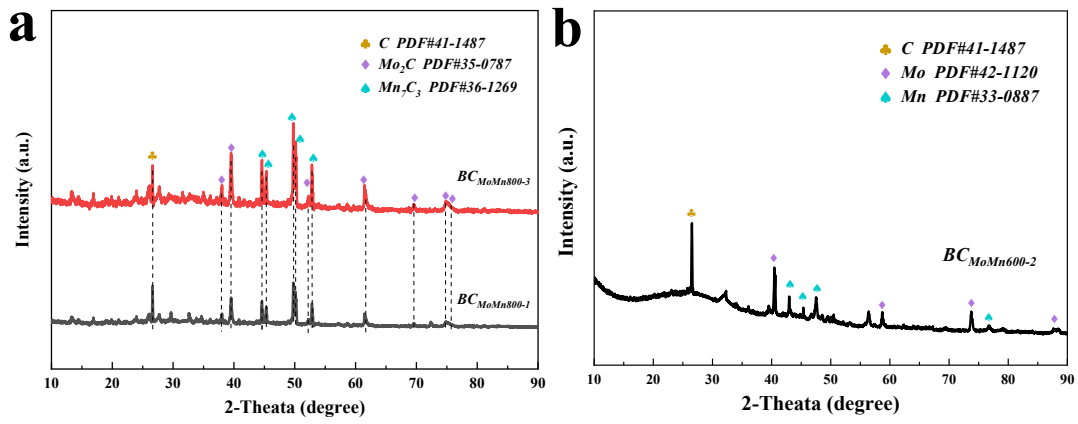

52

53

Figure S1. The XRD spectra of a)  $BC_{MoMn800-1}$  and  $BC_{MoMn800-3}$ , b)  $BC_{MoMn600-2}$ .

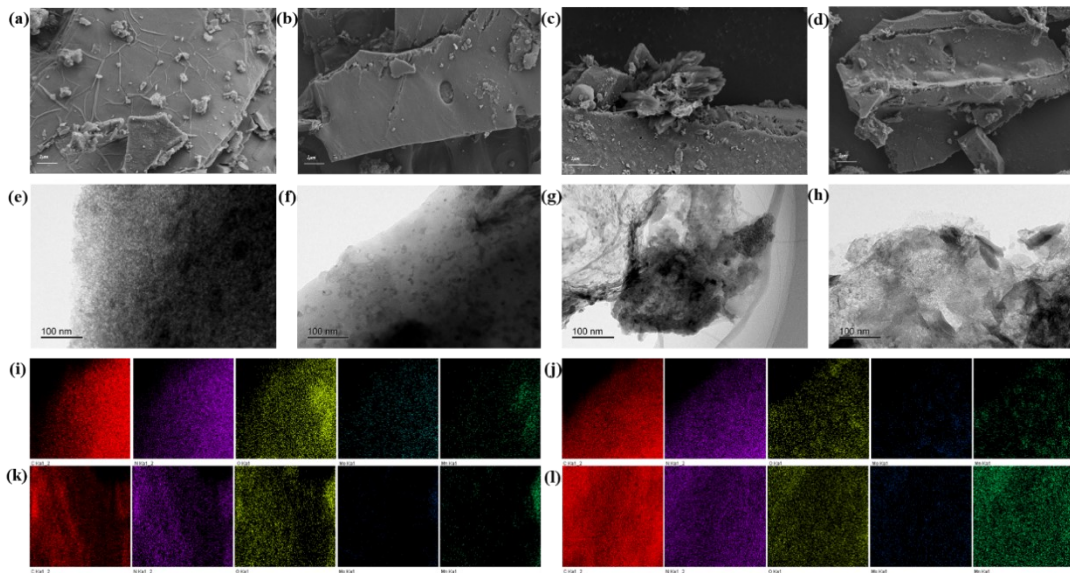

54

55

56

Figure S2. a-d) FESEM, e-h) TEM, and i-l) corresponding EDS line-scan elemental of  $BC_{MoMn700-2}$ ,  $BC_{MoMn800-1}$ ,  $BC_{MoMn800-3}$ , and  $BC_{MoMn900-2}$ .

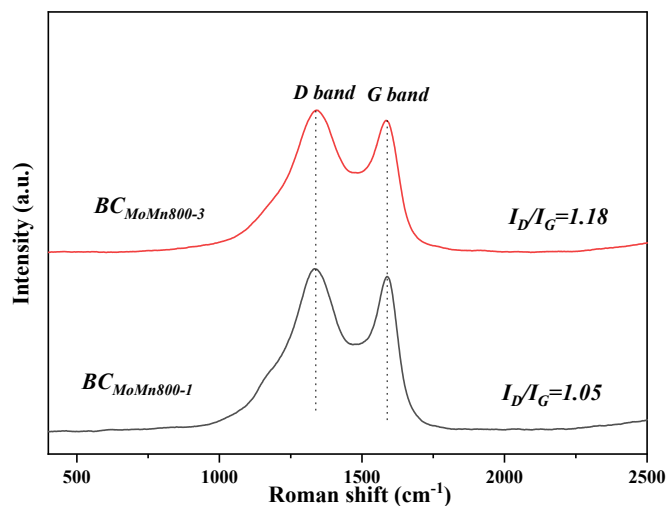

57

58

Figure S3. The Raman spectra of  $BC_{MoMn800-1}$  and  $BC_{MoMn800-3}$ .

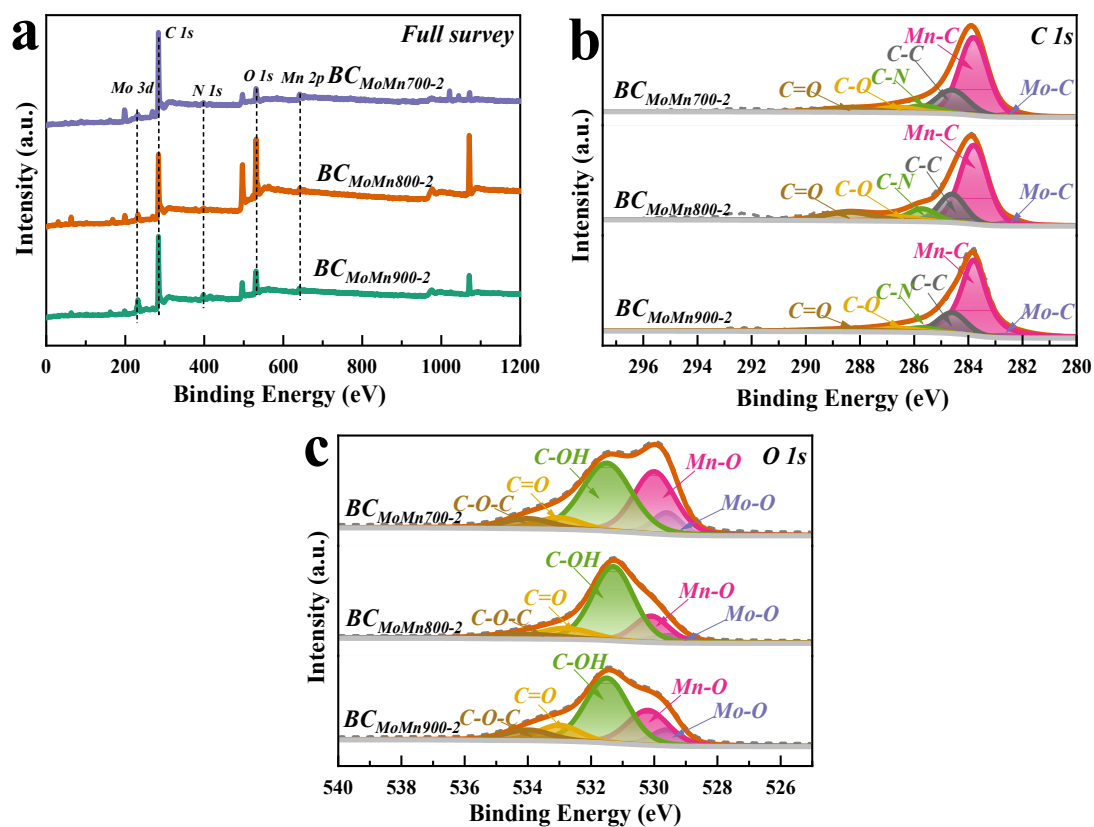

59

60 Figure S4. The a) full survey, b) high-resolution C 1s, and c) O 1s  $BC_{MoMn700-2}$ ,  $BC_{MoMn800-2}$ , and  $BC_{MoMn900-2}$ .

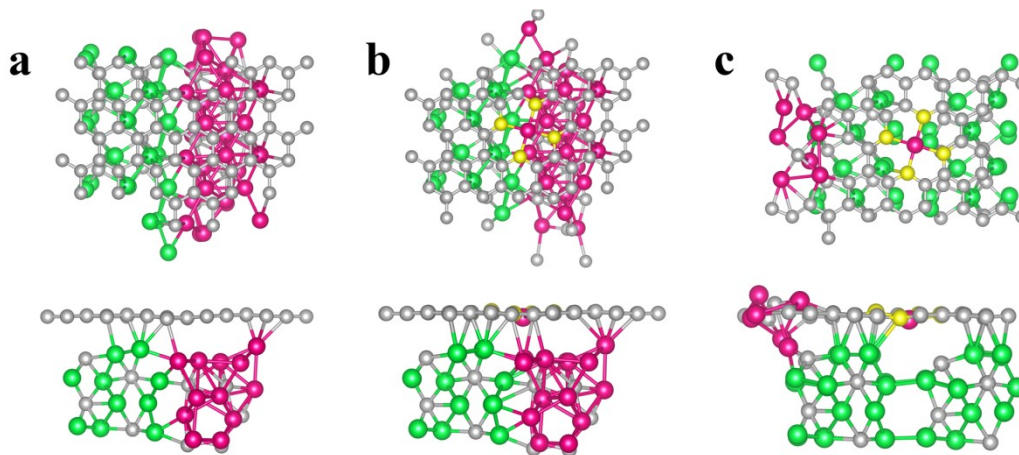

61

62 **Figure S5.** Different views of the optimized structural model. Top and side views of a)  $\text{Mo}_2\text{C-Mn}_7\text{C}_3/\text{graphene}$ , b)  
 63  $\text{Mo}_2\text{C-Mn}_7\text{C}_3/\text{MnN}_4\text{-graphene}$ , and c)  $\text{Mo}_2\text{C/Mn}_7\text{C}_3\text{-MnN}_4\text{-graphene}$  with H adatom.

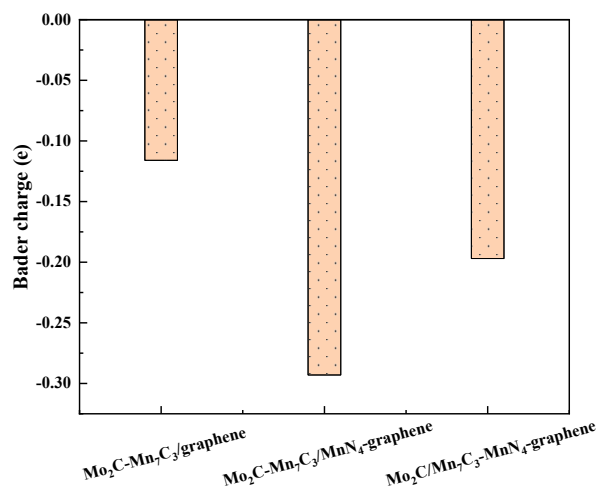

64

65 **Figure S6.** Calculation of Bader charge on  $\text{Mo}_2\text{C-Mn}_7\text{C}_3/\text{graphene}$ ,  $\text{Mo}_2\text{C-Mn}_7\text{C}_3/\text{MnN}_4\text{-graphene}$ , and  
 66  $\text{Mo}_2\text{C/Mn}_7\text{C}_3\text{-MnN}_4\text{-graphene}$ .

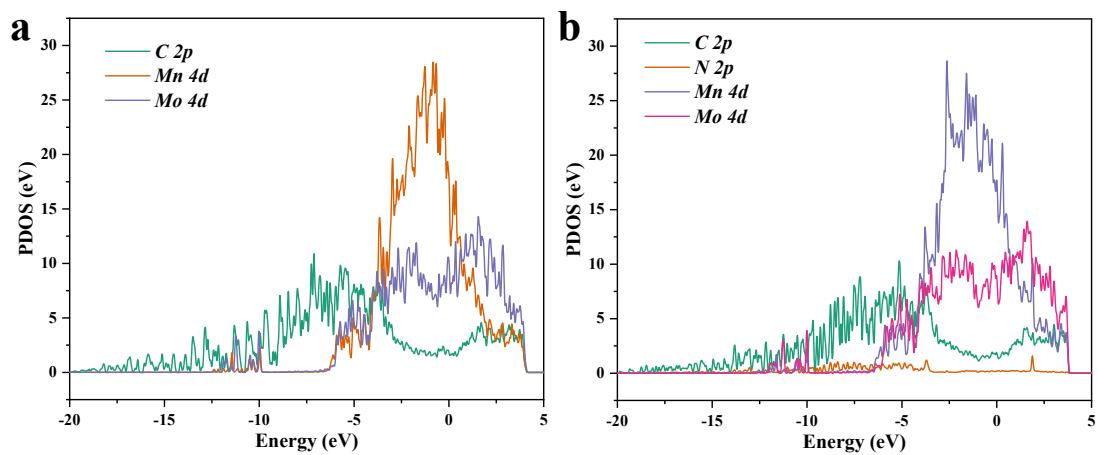

67

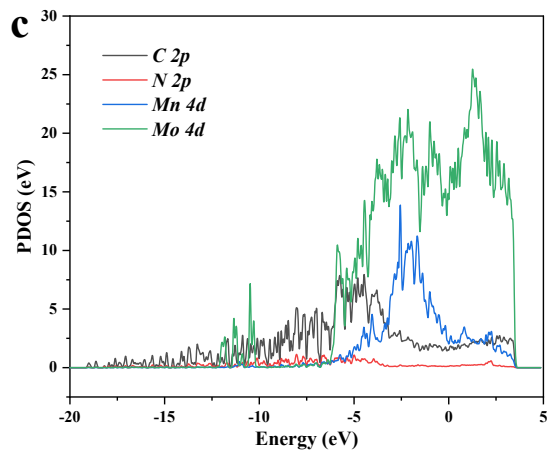

68

69 **Figure S7.** Density of states of a)  $\text{Mo}_2\text{C}-\text{Mn}_7\text{C}_3/\text{graphene}$ , b)  $\text{Mo}_2\text{C}-\text{Mn}_7\text{C}_3/\text{MnN}_4\text{-graphene}$ , and c)  $\text{Mo}_2\text{C}/\text{Mn}_7\text{C}_3\text{-MnN}_4\text{-graphene}$  systems.

70

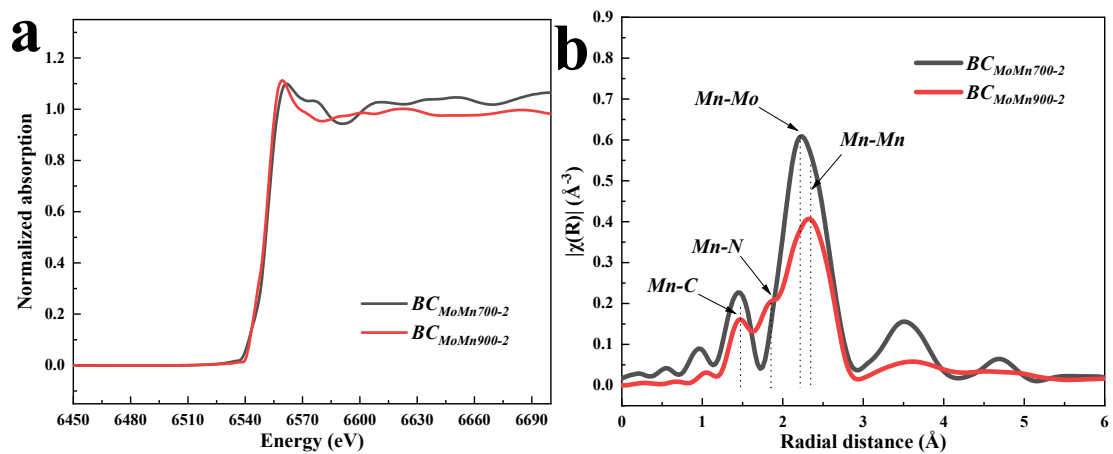

71

72 **Figure S8.** a) Mn K-edge XANES and b) Fourier transforms of EXAFS spectra of  $\text{BC}_{\text{MoMn}700-2}$  and  $\text{BC}_{\text{MoMn}900-2}$ .

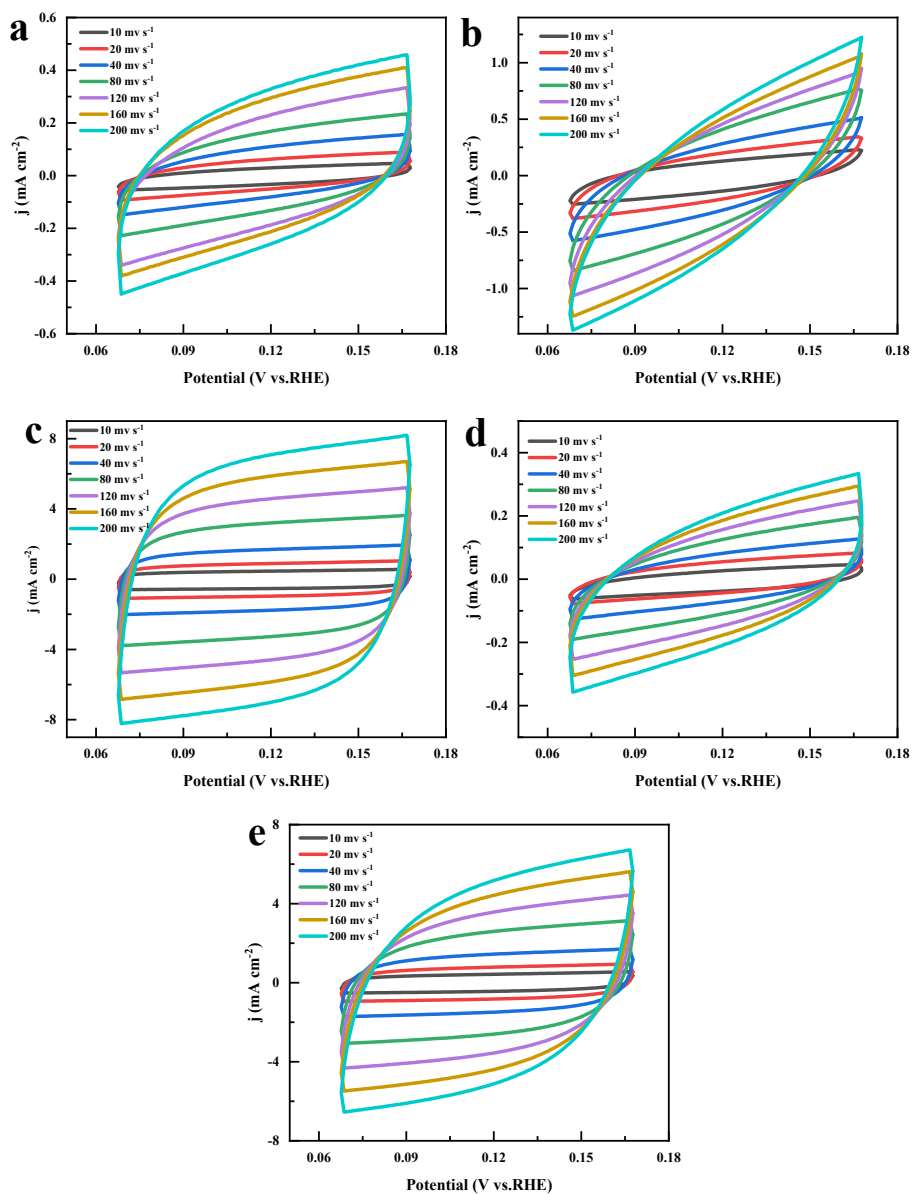

73

74 **Figure S9.** CV curves at different scan rates (10, 20, 40, 80, 120, 160, 200  $\text{mV s}^{-1}$ ) of a)  $\text{BC}_{\text{MoMn700-2}}$ , b)

75

$\text{BC}_{\text{MoMn800-1}}$ , c)  $\text{BC}_{\text{MoMn800-2}}$ , d)  $\text{BC}_{\text{MoMn800-3}}$ , and e)  $\text{BC}_{\text{MoMn900-2}}$ .

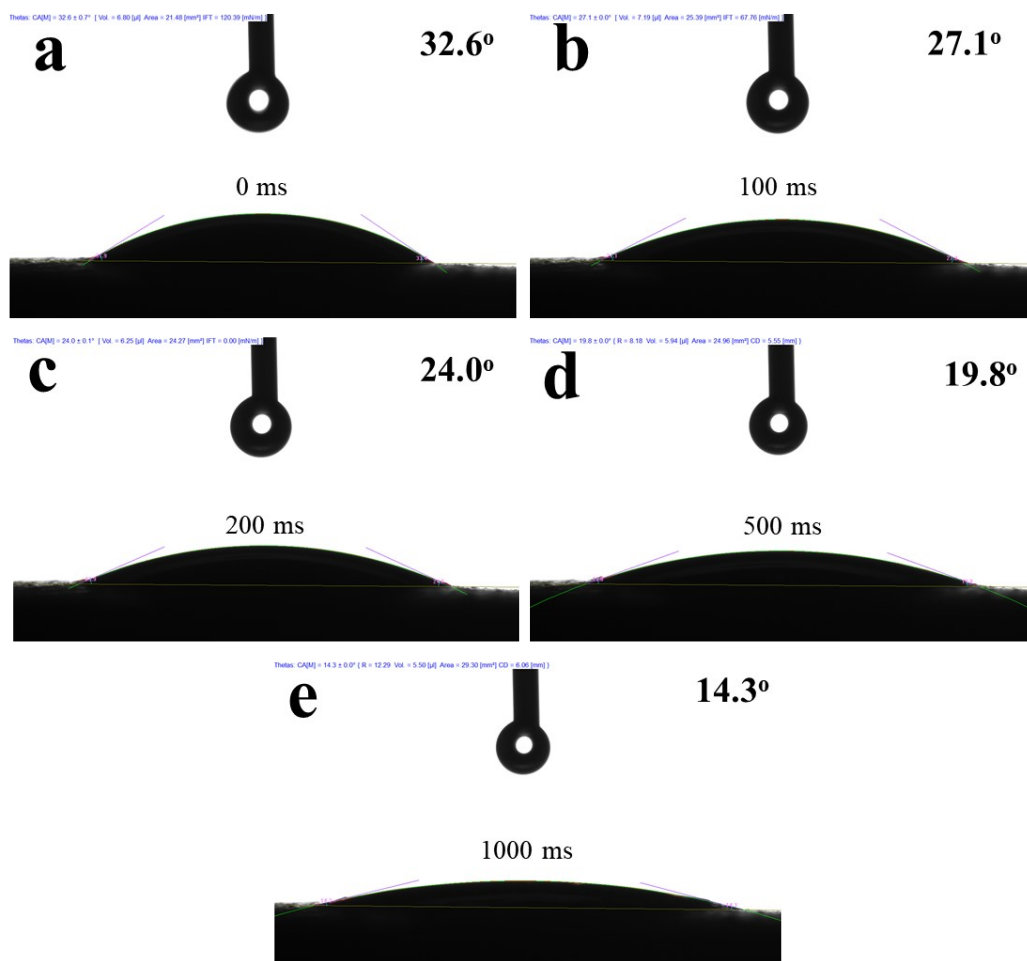

76

77

**Figure S10.** Contact angle images between water and electrodes of  $BC_{MoMn800-2}$ .

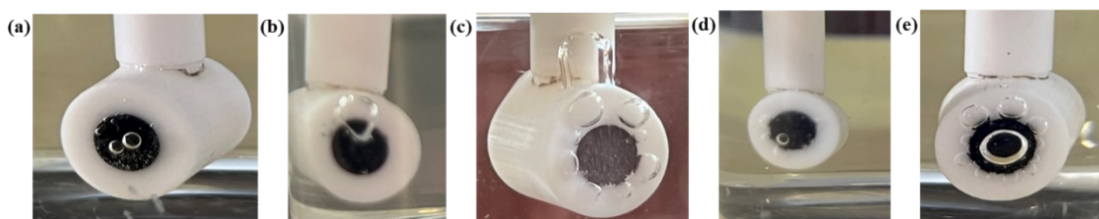

78

**Figure S11.** A map of the bubbles on the electrode surface. a)  $BC_{MoMn700-2}$ , b)  $BC_{MoMn800-1}$ , and c)  $BC_{MoMn800-2}$ , d)

80

$BC_{MoMn800-3}$ , e)  $BC_{MoMn900-2}$ .



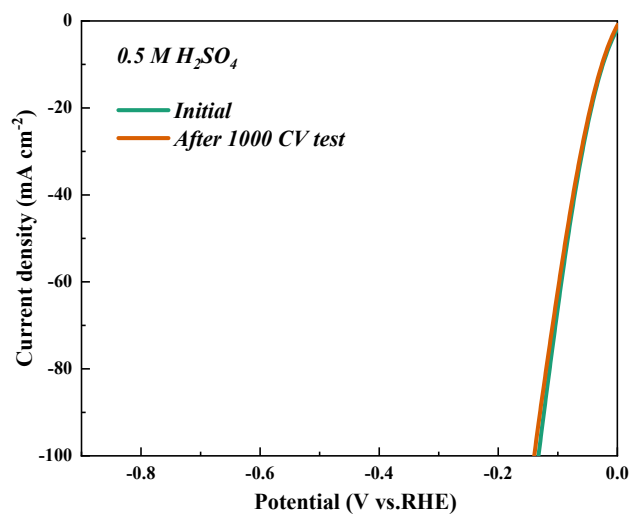

81

82 **Figure S12.** HER polarization curves of  $BC_{MoMn800-2}$  after 1000 CV cycles test at the scan rate of  $100 \text{ mV s}^{-1}$ .

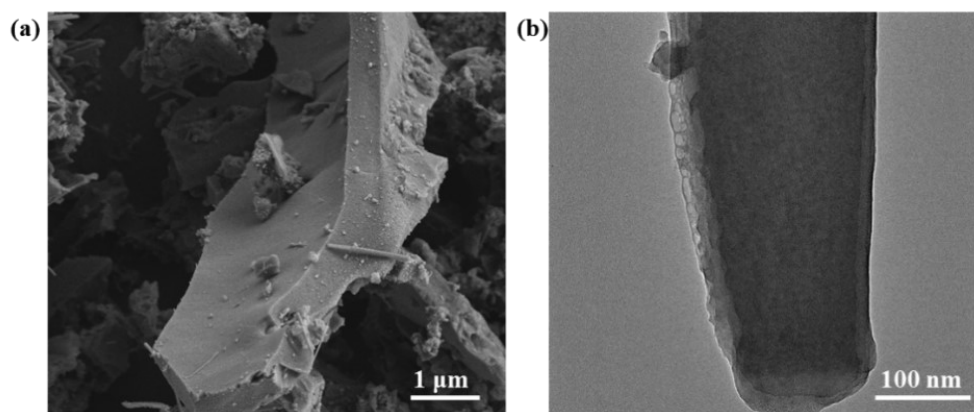

83

84

**Figure S13.** SEM and TEM images of  $BC_{MoMn800-2}$  after CV tests.

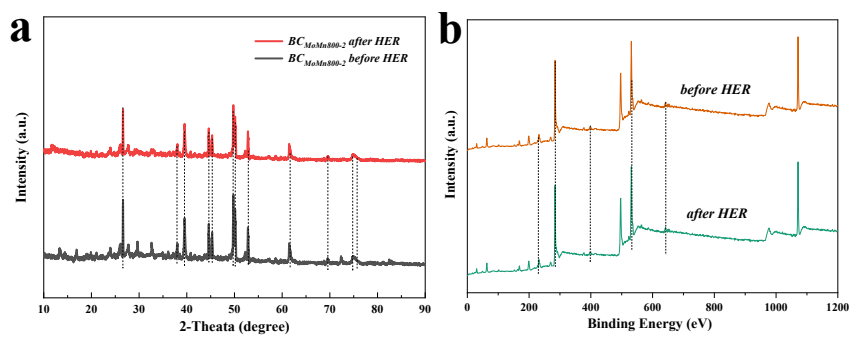

85

86

**Figure S14.** XRD and XPS spectra of  $BC_{MoMn800-2}$  after CV tests.

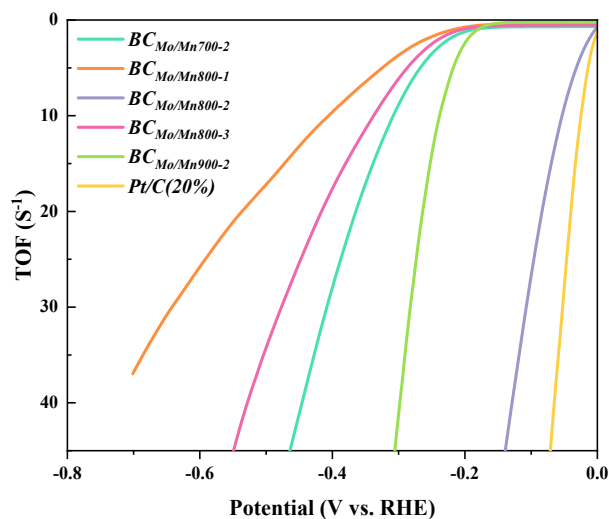

87

88

Figure S15. TOF curves of  $BC_{MoMn700-2}$ ,  $BC_{MoMn800-1}$ ,  $BC_{MoMn800-2}$ ,  $BC_{MoMn800-3}$  and  $BC_{MoMn900-2}$ .

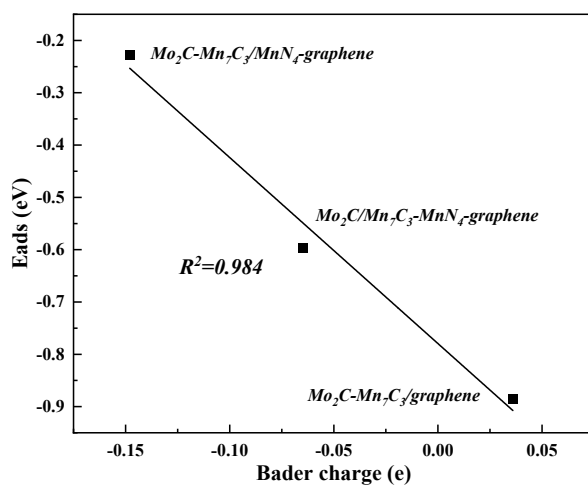

89

90

91

92

Figure S16. The correlation of atomic H adsorption energy with the charge transfer.  $R^2$ , coefficient of determination.

93 **Table S1**94 **Table S1** The content of Mo and Mn elements were detected by ICP-OES.

| Samples                 | The content of Mo element in the samples (wt%) | The content of Mn element in the samples (wt%) |
|-------------------------|------------------------------------------------|------------------------------------------------|
| BC <sub>MoMn700-2</sub> | 4.12                                           | 6.15                                           |
| BC <sub>MoMn800-1</sub> | 4.41                                           | 3.86                                           |
| BC <sub>MoMn800-2</sub> | 6.53                                           | 8.61                                           |
| BC <sub>MoMn800-3</sub> | 9.79                                           | 11.21                                          |
| BC <sub>MoMn900-2</sub> | 8.58                                           | 10.93                                          |

95

96

97 **Table S2**98 **Table S2** Quantitative analysis of functional groups in XPS spectra.99 **N 1s**

| Sample                  | Surface functional group | Group content on the surface |
|-------------------------|--------------------------|------------------------------|
|                         |                          | (at.%)                       |
| BC <sub>MoMn700-2</sub> | oxidized-N               | 39.6                         |
|                         | graphitic-N              | 27.7                         |
|                         | pyrrolic-N               | 15.0                         |
|                         | pyridinic-N              | 17.7                         |
| BC <sub>MoMn800-2</sub> | oxidized-N               | 24.2                         |
|                         | graphitic-N              | 42.6                         |
|                         | Mn-N                     | 21.4                         |
|                         | pyridinic-N              | 11.8                         |
| BC <sub>MoMn900-2</sub> | oxidized-N               | 14.4                         |
|                         | graphitic-N              | 41.4                         |
|                         | Mn-N                     | 19.9                         |
|                         | pyridinic-N              | 24.3                         |

100 **Mo 3d**

| Sample                  | Surface functional group | Group content on the surface |
|-------------------------|--------------------------|------------------------------|
|                         |                          | (at.%)                       |
| BC <sub>MoMn700-2</sub> | Mo <sup>2+</sup>         | 57.2                         |
|                         | Mo <sup>4+</sup>         | 16.6                         |
|                         | Mo <sup>6+</sup>         | 26.2                         |
| BC <sub>MoMn800-2</sub> | Mo <sup>2+</sup>         | 51.3                         |
|                         | Mo <sup>4+</sup>         | 28.2                         |
|                         | Mo <sup>6+</sup>         | 20.5                         |
| BC <sub>MoMn900-2</sub> | Mo <sup>2+</sup>         | 24.4                         |

|  |                  |      |
|--|------------------|------|
|  | Mo <sup>4+</sup> | 54.4 |
|  | Mo <sup>6+</sup> | 21.2 |

101 **Mn 2p**

| <b>Sample</b>           | <b>Surface functional group</b> | <b>Group content on the surface (at.%)</b> |
|-------------------------|---------------------------------|--------------------------------------------|
| BC <sub>MoMn700-2</sub> | Mn <sup>2+</sup>                | 41.6                                       |
|                         | Mn <sup>3+</sup>                | 58.4                                       |
| BC <sub>MoMn800-2</sub> | Mn <sup>2+</sup>                | 47.7                                       |
|                         | Mn <sup>3+</sup>                | 52.3                                       |
| BC <sub>MoMn900-2</sub> | Mn <sup>2+</sup>                | 55.0                                       |
|                         | Mn <sup>3+</sup>                | 45.0                                       |

102
